# Supplementary material for: Vitamin D Pathway and Other Related Polymorphisms and Risk of Prostate Cancer: Results from the Prostate Cancer Prevention Trial
Source: Oxford University Press journal article supplement (doi:10.1158/1940-6207.capr-19-0413), 2020-02-26
Supplement: 19406207capr190413-sup-228224_3_supp_6082622_q5hvjf.docx [file 19406207capr190413-sup-228224_3_supp_6082622_q5hvjf.docx]

| **Supplementary Table 1. Vitamin D-related SNPs with minor allele frequencies (MAF) in prostate cancer cases and controls by race in the Prostate Cancer Prevention Trial.** | | | | | | | | | | |
| --- | --- | --- | --- | --- | --- | --- | --- | --- | --- | --- |
|  |  |  | **Caucasian** | | | | **African American** | | | |
|  |  |  |  | **Cases n=1089** | **Controls n=1083** |  | **Cases** | | **Controls** | |
| **n=47** | | **n=132** | |
| **Gene** | **SNP** | **Alleles** | **Minor** | **MAF** | **MAF** | ***P**** | **Minor** | **MAF** | **MAF** | ***P**** |
| VDR | rs1544410 | A G | A | 0.404 | 0.423 | 0.21 | A | 0.391 | 0.288 | 0.07 |
|  | rs11568820 | A G | A | 0.200 | 0.201 | 0.91 | G | 0.250 | 0.239 | 0.83 |
|  | rs757343 | A G | A | 0.119 | 0.121 | 0.86 | A | 0.064 | 0.076 | 0.69 |
|  | rs11574143 | A G | A | 0.090 | 0.096 | 0.51 | A | 0.064 | 0.098 | 0.31 |
| GC | rs7041 | A C | A | 0.438 | 0.443 | 0.78 | C | 0.202 | 0.221 | 0.70 |
|  | rs222014 | A G | A | 0.112 | 0.110 | 0.89 | A | 0.174 | 0.091 | **0.03** |
|  | rs222016 | G A | G | 0.162 | 0.158 | 0.71 | G | 0.605 | 0.488 | 0.06 |
|  | rs705117 | G A | G | 0.147 | 0.152 | 0.64 | A | 0.404 | 0.341 | 0.27 |
|  | rs2282679 | C A | C | 0.284 | 0.288 | 0.76 | C | 0.141 | 0.102 | 0.31 |
|  | rs12512631 | G A | G | 0.336 | 0.334 | 0.90 | G | 0.283 | 0.352 | 0.22 |
| C1orf88 | rs6599638 | A G | A | 0.462 | 0.447 | 0.31 | A | 0.500 | 0.318 | **0.002** |
| CYP2R1 | rs2060793 | A G | A | 0.390 | 0.388 | 0.92 | A | 0.293 | 0.330 | 0.52 |
| CYP24A! | rs2248359 | A G | A | 0.383 | 0.418 | **0.02** | G | 0.330 | 0.379 | 0.41 |
|  | rs2762942 | A A | A | 0.054 | 0.056 | 0.83 | G | 0.011 | 0.027 | 0.37 |
|  | rs4809958 | A A | A | 0.156 | 0.150 | 0.58 | C | 0.033 | 0.080 | 0.12 |
|  | rs6013897 | A T | A | 0.213 | 0.225 | 0.34 | A | 0.245 | 0.227 | 0.73 |
|  | rs6022999 | G A | G | 0.244 | 0.245 | 0.97 | A | 0.394 | 0.405 | 0.85 |
| CYP27B1 | rs703842 | G A | G | 0.324 | 0.331 | 0.64 | G | 0.277 | 0.331 | 0.33 |
| DHCR7 | rs1790349 | G A | G | 0.163 | 0.153 | 0.33 | G | 0.170 | 0.208 | 0.43 |
| NADSYN1 | rs3829251 | A G | A | 0.159 | 0.161 | 0.88 | A | 0.207 | 0.263 | 0.28 |
|  | rs12785878 | C A | C | 0.257 | 0.269 | 0.35 | A | 0.319 | 0.269 | 0.35 |
| * chi-square test comparing MAF between cases and controls, by race | | | | | |  |  |  |  |  |
|  | | |  |  |  |  |  |  |  |  |
